# Supplementary material for: Dinuclear versus mononuclear pathways in zinc mediated nucleophilic addition: a combined experimental and DFT study
Source: Royal Society of Chemistry journal article supplement (doi:10.1039/c5dt01366f), 2015-01-01
Supplement: c5dt01366f1.pdf [file c5dt01366f1.pdf]

## Supplementary Information

### **Dinuclear *versus* Mononuclear Pathways in Zinc Mediated Nucleophilic Addition: A Combined Experimental and DFT Study**

Xiaotian Qi,<sup>1,2</sup> Yingzi Li,<sup>1</sup> Guanghui Zhang,<sup>2</sup> Yang Li,<sup>1</sup> Aiwen Lei,<sup>2\*</sup>

Chao Liu,<sup>2\*</sup> and Yu Lan<sup>1\*</sup>

<sup>1</sup>*School of Chemistry and Chemical Engineering, Chongqing University, Chongqing, 400030 (P. R. China),*

<sup>2</sup>*College of Chemistry and Molecular Sciences, Wuhan University, Wuhan, Hubei, 430072 (P. R. China).*

[aiwenlei@whu.edu.cn](mailto:aiwenlei@whu.edu.cn)

[chao.liu@whu.edu.cn](mailto:chao.liu@whu.edu.cn)

[lanyu@cqu.edu.cn](mailto:lanyu@cqu.edu.cn)

#### **Table of contents**

|                                                                            |         |
|----------------------------------------------------------------------------|---------|
| 1. Complete reference for Gaussian 09.                                     | Page S2 |
| 2. Absolute calculation energies, enthalpies, and free energies            | Page S2 |
| 3. B3LYP geometries for all the optimized compounds and transition states. | Page S3 |

## 1. Complete Reference for Gaussian 09

Gaussian 09, Revision D.01, Frisch, M. J.; Trucks, G. W.; Schlegel, H. B.; Scuseria, G. E.; Robb, M. A.; Cheeseman, J. R.; Scalmani, G.; Barone, V.; Mennucci, B.; Petersson, G. A.; Nakatsuji, H.; Caricato, M.; Li, X.; Hratchian, H. P.; Izmaylov, A. F.; Bloino, J.; Zheng, G.; Sonnenberg, J. L.; Hada, M.; Ehara, M.; Toyota, K.; Fukuda, R.; Hasegawa, J.; Ishida, M.; Nakajima, T.; Honda, Y.; Kitao, O.; Nakai, H.; Vreven, T.; Montgomery, Jr., J. A.; Peralta, J. E.; Ogliaro, F.; Bearpark, M.; Heyd, J. J.; Brothers, E.; Kudin, K. N.; Staroverov, V. N.; Kobayashi, R.; Normand, J.; Raghavachari, K.; Rendell, A.; Burant, J. C.; Iyengar, S. S.; Tomasi, J.; Cossi, M.; Rega, N.; Millam, N. J.; Klene, M.; Knox, J. E.; Cross, J. B.; Bakken, V.; Adamo, C.; Jaramillo, J.; Gomperts, R.; Stratmann, R. E.; Yazyev, O.; Austin, A. J.; Cammi, R.; Pomelli, C.; Ochterski, J. W.; Martin, R. L.; Morokuma, K.; Zakrzewski, V. G.; Voth, G. A.; Salvador, P.; Dannenberg, J. J.; Dapprich, S.; Daniels, A. D.; Farkas, Ö.; Foresman, J. B.; Ortiz, J. V.; Cioslowski, J.; Fox, D. J. Gaussian, Inc., Wallingford CT, 2013.

## 2. Absolute Calculation Energies, Enthalpies, and Free Energies

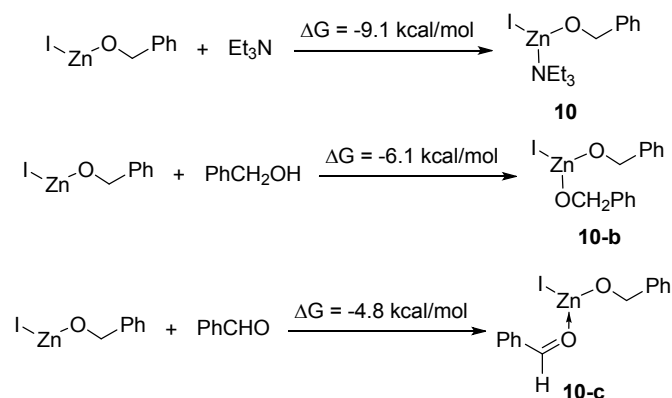

**Figure S1.** Calculated free energies for the combination of IZnOCH<sub>2</sub>Ph with Et<sub>3</sub>N, PhCH<sub>2</sub>OH and PhCHO.

The combination of IZnOCH<sub>2</sub>Ph with Et<sub>3</sub>N, PhCH<sub>2</sub>OH and PhCHO were calculated, respectively. As shown in Figure S1, the coordination free energies of these complex to generate complex **10-a**, **10-b** and **10-c** is 9.1, 6.1 and 4.8 kcal/mol exothermic, respectively. Therefore, although the coordination of IZnOCH<sub>2</sub>Ph with

Et<sub>3</sub>N, PhCH<sub>2</sub>OH and PhCHO is considered, the formation of final product in monometallic mechanism is still uphill.

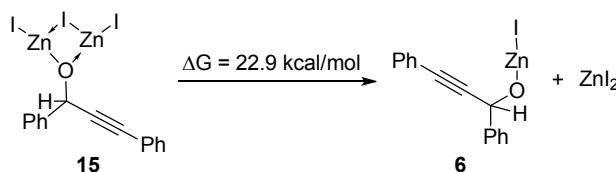

**Figure S2.** The dissociation of ZnI<sub>2</sub> from complex **15**.

As shown in Figure S2, the dissociation of ZnI<sub>2</sub> is calculated to be 22.9 kcal/mol endothermic. Consequently, the combination of dinuclear (step 1) and mononuclear (step 2) mechanisms is supposed to be disadvantageous.

Besides two pathways shown in the manuscript, we also calculated the pathway employing ZnI<sub>2</sub>(Et<sub>3</sub>N)<sub>2</sub> complex as the active catalytic species. When phenylacetylene is utilized to replace the ligand Et<sub>3</sub>N, the structure of alkyne coordinated zinc complex **1-b** is shown in Figure S3. The distance between zinc and the terminal carbon of phenylacetylene is 4.97 Å, which indicates that little interaction exists between zinc and the alkyne. Moreover, as the barrier for ligand exchange is 3.1 kcal/mol, the generation of complex **1-b** is disadvantageous.

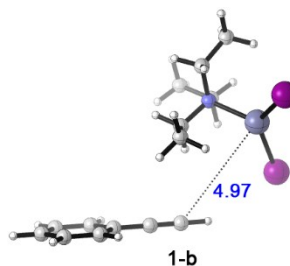

**Figure S3.** Optimized structure of complex **1-b**.

Subsequent deprotonation by Et<sub>3</sub>N leads to the formation of anionic zinc complex **1-c**. As depicted in Figure S4, the barrier is calculated to be 31.9 kcal/mol endothermic. Therefore, this pathway is unfavorable thermodynamically and could be ruled out.

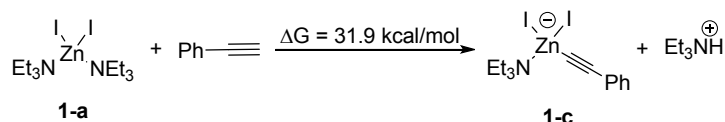

**Figure S4.** Calculated free energy for the generation of anionic zinc complex **1-c**.

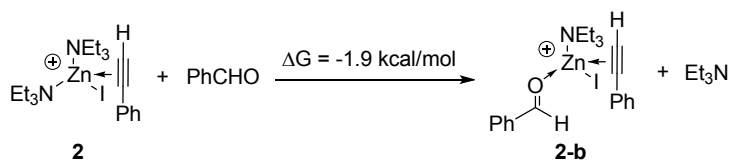

**Figure S5.** Calculated free energy for the ligand exchange of Et<sub>3</sub>N by aldehyde.

It is noteworthy that a reaction pathway in which benzaldehyde coordination occurs first, followed by Zn complex as Lewis acid attacks electrophilically phenylacetylene is also possible. We have calculated the ligand exchange process shown in Figure S5, the free energy of which turns out to be 1.9 kcal/mol exothermic, which indicates the generation of complex **2-b** is possible. Thus, the pathway in which benzaldehyde coordination occurs first, followed by Zn complex as Lewis acid attacks electrophilically phenylacetylene could not be ruled out. However, both two possibilities would lead to the formation of intermediate **4**, thus the change of sequence will not affect the rate-determining step as well as the final conclusion.

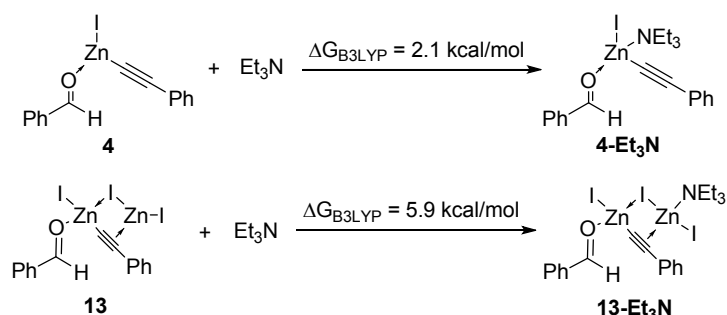

**Figure S6.** B3LYP calculated free energy for the formation of four-coordinated zinc complex.

In our theoretical study, the structure of compounds and transition states are optimized and determined at B3-LYP level. As the calculated results suggested the generation of four-coordinated zinc is endothermic (Figure S6), the structure of three-coordinate zinc was finally employed for solvation calculation.

| Geometry | $E_{(\text{elec-B3LYP})}^{\text{a}}$ | $E_{(\text{solv, M11-L})}^{\text{b}}$ | $G_{(\text{corr-B3LYP})}^{\text{c}}$ | $H_{(\text{corr-B3LYP})}^{\text{d}}$ | IF <sup>e</sup> |
|----------|--------------------------------------|---------------------------------------|--------------------------------------|--------------------------------------|-----------------|
| <b>1</b> | -823.284478                          | -661.885012                           | 0.367061                             | 0.445723                             | -               |
| <b>2</b> | -1131.680197                         | -970.296615                           | 0.467553                             | 0.565499                             | -               |
| <b>3</b> | -838.863672                          | -677.439360                           | 0.257163                             | 0.333188                             | -               |

|                |              |              |          |          |         |
|----------------|--------------|--------------|----------|----------|---------|
| <b>4</b>       | -892.018996  | -730.597753  | 0.158204 | 0.232266 | -       |
| <b>5-ts</b>    | -891.974400  | -730.567046  | 0.160556 | 0.230371 | -421.03 |
| <b>6</b>       | -892.008211  | -730.600403  | 0.162234 | 0.232737 | -       |
| <b>7</b>       | -1237.596229 | -1076.201956 | 0.261928 | 0.351502 | -       |
| <b>8-ts</b>    | -1237.573798 | -1076.176124 | 0.259615 | 0.347708 | -735.59 |
| <b>9</b>       | -1237.604431 | -1076.203055 | 0.259305 | 0.352856 | -       |
| <b>10</b>      | -877.247662  | -715.822485  | 0.277978 | 0.355888 | -       |
| <b>11</b>      | -1088.990635 | -766.1379360 | 0.244696 | 0.342016 | -       |
| <b>11a</b>     | -1088.983613 | -766.123903  | 0.244908 | 0.342126 | -       |
| <b>12</b>      | -796.552552  | -473.6827023 | 0.046703 | 0.121106 | -       |
| <b>13</b>      | -1142.146047 | -819.2913788 | 0.146074 | 0.241086 | -       |
| <b>14-ts</b>   | -1142.111179 | -819.264404  | 0.149561 | 0.239700 | -263.41 |
| <b>15</b>      | -1142.149820 | -819.312211  | 0.150479 | 0.241894 | -       |
| <b>16</b>      | -1487.743320 | -1164.917669 | 0.248525 | 0.361855 | -       |
| <b>17-ts</b>   | -1487.699048 | -1164.876835 | 0.251797 | 0.356736 | -608.78 |
| <b>18</b>      | -1487.719298 | -1164.885564 | 0.248918 | 0.361758 | -       |
| <b>19</b>      | -1487.755218 | -1164.926213 | 0.250973 | 0.362337 | -       |
| <b>10-b</b>    | -931.596745  | -770.184334  | 0.202240 | 0.279389 | -       |
| <b>10-c</b>    | -930.396469  | -768.977867  | 0.179340 | 0.255030 | -       |
| <b>1-a</b>     | -834.957371  | -673.550121  | 0.365300 | 0.448922 | -       |
| <b>1-b</b>     | -850.930729  | -689.518126  | 0.257277 | 0.346781 | -       |
| <b>1-c</b>     | -850.419879  | -689.055254  | 0.252300 | 0.335255 | -       |
| <b>2-b</b>     | -1184.847724 | -1023.460004 | 0.367033 | 0.464140 | -       |
| <b>4-Et3N</b>  | -1184.450364 | -1023.041291 | 0.356001 | 0.453082 | -       |
| <b>13-Et3N</b> | -1434.575407 | -1111.731900 | 0.347897 | 0.461269 | -       |

<sup>a</sup>The electronic energy calculated by B3LYP in gas phase. <sup>b</sup>The electronic energy calculated by M11-L in toluene solvent. <sup>c</sup>The thermal correction to Gibbs free energy calculated by B3LYP in gas phase. <sup>d</sup>The thermal correction to enthalpy calculated by B3LYP in gas phase. <sup>e</sup>The B3LYP calculated imaginary frequencies for the transition states.

### 3. B3LYP Geometries for All the Optimized Compounds and Transition States

|          |             |             |             |          |             |             |             |
|----------|-------------|-------------|-------------|----------|-------------|-------------|-------------|
| <b>1</b> |             |             |             | H        | 3.86966000  | -1.26765700 | -1.37741200 |
| Zn       | -0.00309600 | -0.04077200 | 0.00039000  | H        | 1.06864200  | 2.80477200  | -0.42051600 |
| I        | -0.09644300 | -2.53950800 | -0.00743200 | C        | 3.21047900  | 2.97597200  | -0.58065000 |
| N        | 1.81690200  | 0.97961800  | 0.29943600  | H        | 3.36691500  | 3.43872500  | 0.39768400  |
| N        | -1.74208400 | 1.11464900  | -0.28780900 | H        | 4.09634600  | 2.38644600  | -0.83216300 |
| C        | -1.71802500 | 1.64450300  | -1.70015600 | H        | 3.13793000  | 3.78442100  | -1.31546900 |
| H        | -2.70729600 | 2.05254800  | -1.93603000 | H        | 1.46419500  | 0.89841200  | 3.75831500  |
| H        | -1.01260900 | 2.48149900  | -1.71475400 |          |             |             |             |
| C        | -1.32108100 | 0.61891100  | -2.75916600 | <b>2</b> |             |             |             |
| H        | -0.31056000 | 0.21755400  | -2.59814000 | Zn       | 0.61605300  | 0.04023300  | 0.14991600  |
| H        | -2.01144400 | -0.22642100 | -2.81675000 | I        | -0.75203600 | -0.36314300 | -1.99752800 |
| H        | -1.31570500 | 1.10757400  | -3.73891400 | N        | 1.66444400  | 1.99077800  | 0.00421100  |
| C        | -2.93615000 | 0.20042800  | -0.11538600 | N        | 1.88177300  | -1.72680600 | 0.69385500  |
| H        | -3.82005900 | 0.72626800  | -0.49611600 | C        | 3.07281500  | -1.40398600 | 1.55236100  |
| H        | -2.76585700 | -0.66391400 | -0.75979600 | H        | 3.69020300  | -2.30605700 | 1.63683700  |
| C        | -3.18288300 | -0.27665000 | 1.31262200  | H        | 3.66870200  | -0.66671200 | 1.00597000  |
| H        | -2.29966700 | -0.75734300 | 1.74641100  | C        | 2.78455700  | -0.89741000 | 2.96390700  |
| H        | -3.51573000 | 0.52460500  | 1.97830600  | H        | 2.17381000  | 0.00922400  | 2.97103400  |
| H        | -3.97451500 | -1.03206600 | 1.28867000  | H        | 2.29841000  | -1.64947300 | 3.59079800  |
| C        | -1.77918000 | 2.26468800  | 0.68972900  | H        | 3.73817900  | -0.64933000 | 3.44169500  |
| H        | -1.68863500 | 1.83910800  | 1.69277700  | C        | 1.04846700  | -2.76138900 | 1.40395100  |
| H        | -0.87616800 | 2.85489000  | 0.50685200  | H        | 1.72233600  | -3.54455400 | 1.77793700  |
| C        | -3.00409800 | 3.17962600  | 0.62396700  | H        | 0.61551700  | -2.27353600 | 2.27988600  |
| H        | -2.89068200 | 3.96120400  | 1.38231900  | C        | -0.07189400 | -3.39923300 | 0.58737200  |
| H        | -3.10404200 | 3.67749200  | -0.34448600 | H        | -0.76348700 | -2.65802100 | 0.17938200  |
| H        | -3.93555600 | 2.64938000  | 0.84017400  | H        | 0.30049300  | -4.00276400 | -0.24450200 |
| C        | 1.85083200  | 1.46761400  | 1.72660100  | H        | -0.63443600 | -4.06728100 | 1.24881600  |
| H        | 2.86258800  | 1.82628300  | 1.94682000  | C        | 2.38147600  | -2.23633400 | -0.63835900 |
| H        | 1.18285500  | 2.33339200  | 1.78207600  | H        | 1.51016300  | -2.34112300 | -1.28633700 |
| C        | 2.94003300  | -0.00998600 | 0.07952300  | H        | 2.99090200  | -1.43220700 | -1.06242500 |
| H        | 2.72000500  | -0.87855800 | 0.70279000  | C        | 3.18907800  | -3.53921300 | -0.64029800 |
| H        | 3.86531500  | 0.44135500  | 0.45765200  | H        | 3.42868700  | -3.78147200 | -1.68108200 |
| C        | 1.92014500  | 2.15461100  | -0.64301500 | H        | 4.13771200  | -3.46332100 | -0.10138500 |
| H        | 1.77633200  | 1.76989000  | -1.65631300 | H        | 2.62810700  | -4.38547100 | -0.23325400 |
| C        | 1.43818300  | 0.43086600  | 2.76868100  | C        | 3.00810000  | 1.83391000  | -0.65758900 |
| H        | 2.10406400  | -0.43524200 | 2.79655000  | H        | 3.52495400  | 2.80032500  | -0.62407300 |
| H        | 0.41455400  | 0.06224800  | 2.61539200  | H        | 3.58676500  | 1.14703700  | -0.03191800 |
| C        | 3.12757400  | -0.46323500 | -1.36524000 | C        | 0.82569400  | 2.93007700  | -0.82123900 |
| H        | 2.20722300  | -0.87605400 | -1.79217700 | H        | 0.63131200  | 2.42838600  | -1.76973100 |
| H        | 3.49757800  | 0.33234200  | -2.01799600 | H        | 1.42594400  | 3.82405200  | -1.03684700 |

|          |             |             |             |          |             |             |             |
|----------|-------------|-------------|-------------|----------|-------------|-------------|-------------|
| C        | 1.87152800  | 2.51817500  | 1.39909000  | H        | -6.67384500 | 1.64124400  | 0.52411800  |
| H        | 0.90438300  | 2.47359600  | 1.90515100  | H        | -7.79328400 | -0.52368400 | 0.02888400  |
| C        | 2.99158600  | 1.34123300  | -2.10362800 | N        | 1.54007200  | 1.86577300  | 0.01527200  |
| H        | 2.59803600  | 2.09189800  | -2.79367500 | C        | 3.04021100  | 1.82307500  | 0.01574400  |
| H        | 2.40391900  | 0.42879300  | -2.23553500 | H        | 3.34088800  | 1.06746100  | 0.74290100  |
| C        | -0.50821600 | 3.33509800  | -0.20221200 | H        | 3.40718700  | 2.79970200  | 0.37093100  |
| H        | -1.13576200 | 2.46385600  | 0.00382900  | C        | 1.05608900  | 2.41411200  | 1.32279000  |
| H        | -0.39799100 | 3.91932100  | 0.71626400  | H        | 1.38726800  | 3.46186000  | 1.40684500  |
| H        | -1.04304600 | 3.95826100  | -0.92632200 | H        | -0.03489500 | 2.41372600  | 1.28313900  |
| H        | 2.53210800  | 1.80521400  | 1.90122600  | C        | 1.08031800  | 2.75266400  | -1.10867900 |
| C        | 2.45413400  | 3.92890900  | 1.54820600  | H        | 1.67871700  | 3.67738600  | -1.07346800 |
| H        | 3.46062000  | 4.02333200  | 1.13192700  | H        | 1.33700900  | 2.24062800  | -2.03907800 |
| H        | 1.82058300  | 4.69611000  | 1.09469900  | C        | 3.68744000  | 1.49140600  | -1.32810500 |
| H        | 2.52502100  | 4.15548600  | 2.61745600  | H        | 3.58995200  | 2.29968300  | -2.05851800 |
| H        | 4.02303100  | 1.13157700  | -2.40683800 | H        | 4.75682600  | 1.32432800  | -1.16156500 |
| C        | -1.81468100 | 0.13538900  | 1.73651100  | H        | 3.28020100  | 0.57049100  | -1.75567700 |
| C        | -3.14140800 | 0.06724700  | 1.27834300  | C        | -0.40497000 | 3.11300300  | -1.13147400 |
| C        | -3.87335600 | 1.25742500  | 1.04885200  | H        | -0.61298200 | 3.62751500  | -2.07624900 |
| C        | -3.75505000 | -1.19046200 | 1.06472800  | H        | -1.04435600 | 2.22809900  | -1.07652400 |
| C        | -5.18749400 | 1.18298900  | 0.60791900  | H        | -0.68287800 | 3.79551100  | -0.32276700 |
| H        | -3.40093800 | 2.21828600  | 1.22429000  | C        | 1.50347600  | 1.62805500  | 2.55524000  |
| C        | -5.06937700 | -1.24890200 | 0.62216600  | H        | 1.23619500  | 0.56663400  | 2.48608900  |
| H        | -3.18892900 | -2.09809500 | 1.24532100  | H        | 2.57943700  | 1.69455600  | 2.73683200  |
| C        | -5.78265500 | -0.06603400 | 0.39263600  | H        | 0.99195100  | 2.03598700  | 3.43339600  |
| H        | -5.75210400 | 2.09264200  | 0.43001100  |          |             |             |             |
| H        | -5.54224600 | -2.21099300 | 0.45313100  | <b>4</b> |             |             |             |
| H        | -6.81039700 | -0.11784000 | 0.04534700  | C        | -3.03788600 | 0.22663300  | -0.00685400 |
| C        | -0.61384700 | 0.19768200  | 2.04272300  | C        | -1.90663300 | -0.24150500 | -0.01283600 |
| H        | 0.02549500  | 0.26160400  | 2.90532000  | Zn       | -0.16656500 | -0.97484800 | -0.00937500 |
|          |             |             |             | I        | 1.35008300  | -2.98738600 | 0.02036300  |
| <b>3</b> |             |             |             | O        | 1.20857200  | 0.68208700  | -0.03530300 |
| Zn       | 0.65942200  | -0.13206900 | -0.08953900 | C        | 2.44416000  | 0.64887800  | 0.01845100  |
| I        | 2.39750400  | -1.98541200 | 0.02016700  | H        | 2.95594500  | -0.32517700 | 0.08780500  |
| C        | -1.25201500 | -0.12916100 | -0.08385700 | C        | -4.35536500 | 0.77762000  | 0.00171700  |
| C        | -2.47642500 | -0.18839900 | -0.06000200 | C        | -5.48038500 | -0.04691400 | -0.20046200 |
| C        | -3.90258100 | -0.27414600 | -0.03613400 | C        | -4.55463700 | 2.15664600  | 0.21424600  |
| C        | -4.54864100 | -1.49571800 | -0.31433100 | C        | -6.76331100 | 0.49527500  | -0.18948600 |
| C        | -4.69010900 | 0.85495500  | 0.26579000  | H        | -5.33185900 | -1.10979600 | -0.36426200 |
| C        | -5.93858800 | -1.58032200 | -0.29077900 | C        | -5.84074000 | 2.69090800  | 0.22486800  |
| H        | -3.94616900 | -2.36853600 | -0.54611300 | H        | -3.69065400 | 2.79535500  | 0.37066900  |
| C        | -6.07965500 | 0.76214900  | 0.28869600  | C        | -6.94898800 | 1.86389300  | 0.02319400  |
| H        | -4.19856000 | 1.79883000  | 0.48204600  | H        | -7.62172300 | -0.15239900 | -0.34683600 |
| C        | -6.70902100 | -0.45401000 | 0.01052400  | H        | -5.97947200 | 3.75604700  | 0.39085600  |
| H        | -6.42275200 | -2.52887500 | -0.50731700 | H        | -7.95137300 | 2.28347000  | 0.03172100  |

|             |             |             |             |          |             |             |             |
|-------------|-------------|-------------|-------------|----------|-------------|-------------|-------------|
| C           | 3.28402900  | 1.83969000  | -0.00552800 | C        | -0.00365200 | 1.61638400  | 0.61894400  |
| C           | 4.67930600  | 1.68465900  | 0.06614300  | C        | -0.95841800 | 0.92278700  | 0.92420600  |
| C           | 2.71840500  | 3.12556200  | -0.09856300 | C        | -2.03149600 | -0.03127400 | 1.27451000  |
| C           | 5.50490700  | 2.80561600  | 0.04559600  | H        | -2.32004500 | 0.15351600  | 2.32325700  |
| H           | 5.10610200  | 0.68710000  | 0.13745900  | O        | -1.53552900 | -1.36133400 | 1.19643400  |
| C           | 3.54709600  | 4.24018500  | -0.11935200 | Zn       | 0.12530900  | -1.44786700 | 0.46433200  |
| H           | 1.63876900  | 3.22260700  | -0.15281900 | I        | 2.30797800  | -2.11864300 | -0.42569900 |
| C           | 4.93755300  | 4.07980200  | -0.04714000 | C        | -3.27877000 | 0.17493200  | 0.40483000  |
| H           | 6.58310500  | 2.69057600  | 0.10085600  | C        | -3.80498300 | 1.45823300  | 0.21012600  |
| H           | 3.11897000  | 5.23554100  | -0.19137100 | C        | -3.93077000 | -0.92524200 | -0.15717100 |
| H           | 5.58112100  | 4.95514500  | -0.06360100 | C        | -4.96481900 | 1.63881400  | -0.54281400 |
| <b>5-ts</b> |             |             |             | H        | -3.30116000 | 2.31991600  | 0.64222300  |
| C           | -1.34170000 | -1.01687200 | -0.28023600 | C        | -5.09174300 | -0.74290600 | -0.91342800 |
| C           | -0.42947800 | -0.19653000 | -0.46696100 | H        | -3.52391300 | -1.91669700 | 0.00735400  |
| Zn          | 1.58907700  | 0.22704600  | -0.37005700 | C        | -5.61168000 | 0.53687800  | -1.10881500 |
| I           | 3.75990000  | -0.74073800 | 0.34470800  | H        | -5.36176200 | 2.63987000  | -0.69016200 |
| O           | 0.92555500  | 1.91709600  | -1.07935800 | H        | -5.59011600 | -1.60535500 | -1.34867200 |
| C           | -0.34027300 | 1.57029900  | -1.20155200 | H        | -6.51451800 | 0.67699700  | -1.69730200 |
| H           | -0.67444700 | 1.24119400  | -2.19612200 | C        | 1.09375500  | 2.45954500  | 0.25973000  |
| C           | -2.40296100 | -1.92601100 | -0.05596500 | C        | 2.06692700  | 2.80883000  | 1.21604800  |
| C           | -2.76534900 | -2.86475800 | -1.04822800 | C        | 1.21071900  | 2.95339200  | -1.05416300 |
| C           | -3.11645600 | -1.90003700 | 1.16377100  | C        | 3.13113300  | 3.63413100  | 0.86198400  |
| C           | -3.81424100 | -3.74921400 | -0.82266300 | H        | 1.97733400  | 2.42802500  | 2.22876400  |
| H           | -2.21250800 | -2.88585500 | -1.98210000 | C        | 2.27833700  | 3.77840100  | -1.39849900 |
| C           | -4.16422100 | -2.78887600 | 1.37808500  | H        | 0.46096400  | 2.68324900  | -1.79130900 |
| H           | -2.83386900 | -1.17915700 | 1.92417500  | C        | 3.23954400  | 4.12038800  | -0.44356600 |
| C           | -4.51429500 | -3.71281400 | 0.38798900  | H        | 3.87784200  | 3.89771700  | 1.60562200  |
| H           | -4.08776700 | -4.46965900 | -1.58802600 | H        | 2.36138600  | 4.15435400  | -2.41427900 |
| H           | -4.70934000 | -2.76489400 | 2.31718900  | H        | 4.07163100  | 4.76342600  | -0.71643900 |
| H           | -5.33249100 | -4.40649900 | 0.56056900  | <b>7</b> |             |             |             |
| C           | -1.36965100 | 2.37396500  | -0.47788400 | C        | 1.07701700  | 1.72648300  | -0.35879400 |
| C           | -0.98299500 | 3.25701000  | 0.53887700  | C        | 1.60950800  | 0.81157000  | -0.96174800 |
| C           | -2.72089800 | 2.28871700  | -0.84405400 | C        | 2.16760000  | -0.39974100 | -1.60947100 |
| C           | -1.93908100 | 4.03926800  | 1.18536800  | H        | 1.86948000  | -0.36400500 | -2.67398100 |
| H           | 0.06906400  | 3.33306400  | 0.79289100  | O        | 1.63369200  | -1.56040800 | -1.01747300 |
| C           | -3.67486800 | 3.07110100  | -0.19891600 | Zn       | 0.30291200  | -1.22658100 | 0.22144000  |
| H           | -3.02032600 | 1.60360400  | -1.63456400 | I        | -0.43062800 | -1.51459800 | 2.61266200  |
| C           | -3.28469300 | 3.94657200  | 0.82036100  | C        | -2.64412100 | -0.83265700 | -0.44969000 |
| H           | -1.63475100 | 4.72630900  | 1.97029400  | O        | -1.49523700 | -0.90576300 | -0.90294100 |
| H           | -4.71970700 | 3.00371100  | -0.48946800 | H        | -2.80430800 | -0.93226400 | 0.63653100  |
| H           | -4.02833800 | 4.55822300  | 1.32426100  | C        | 0.47632000  | 2.82785600  | 0.32828900  |
| <b>6</b>    |             |             |             | C        | 0.61079100  | 2.96109100  | 1.72434200  |
|             |             |             |             | C        | -0.25478100 | 3.79874000  | -0.38438400 |



|   |             |             |             |   |             |             |             |
|---|-------------|-------------|-------------|---|-------------|-------------|-------------|
| C | 0.02559500  | 4.03876900  | 2.38535400  | C | -1.52723900 | 4.92094700  | -0.38010800 |
| H | 1.17252800  | 2.21454600  | 2.27678600  | C | -4.21067800 | 4.25995700  | -0.80522100 |
| C | -0.83182100 | 4.87543600  | 0.28460700  | H | -3.64157200 | 2.24450300  | -0.28840300 |
| H | -0.35772100 | 3.69908300  | -1.46076600 | C | -2.43595700 | 5.90445800  | -0.76150200 |
| C | -0.69476400 | 4.99871200  | 1.66988100  | H | -0.48432300 | 5.17060900  | -0.21058800 |
| H | 0.13473300  | 4.12988900  | 3.46248300  | C | -3.77789300 | 5.57781300  | -0.97530900 |
| H | -1.38956300 | 5.62061800  | -0.27626600 | H | -5.25331600 | 4.00306600  | -0.96942000 |
| H | -1.14664500 | 5.83941800  | 2.18921300  | H | -2.09709300 | 6.92848300  | -0.89136600 |
| C | -3.82547600 | -0.62179800 | -1.27723300 | H | -4.48406400 | 6.34799300  | -1.27274600 |
| C | -5.08323300 | -0.55083700 | -0.65382300 | C | 2.48693400  | -0.59531600 | -1.78297600 |
| C | -3.72007700 | -0.49179400 | -2.67494200 | C | 3.34583800  | 0.45236100  | -2.14946300 |
| C | -6.22850800 | -0.35055100 | -1.41999900 | C | 3.00112800  | -1.89082500 | -1.62725500 |
| H | -5.15384800 | -0.65276900 | 0.42644600  | C | 4.70112000  | 0.20806700  | -2.35929200 |
| C | -4.86609200 | -0.29235000 | -3.43430400 | H | 2.94717800  | 1.45707700  | -2.27241400 |
| H | -2.73958300 | -0.55159200 | -3.13642800 | C | 4.35641600  | -2.13256700 | -1.83970900 |
| C | -6.11763400 | -0.22176000 | -2.80739500 | H | 2.32477200  | -2.69641300 | -1.36109700 |
| H | -7.20194000 | -0.29508000 | -0.94231800 | C | 5.20827800  | -1.08516300 | -2.20361400 |
| H | -4.79349000 | -0.19201800 | -4.51315700 | H | 5.36105600  | 1.02188900  | -2.64635200 |
| H | -7.01081600 | -0.06605300 | -3.40627200 | H | 4.75008900  | -3.13889000 | -1.72641200 |
| C | 3.70373500  | -0.38085900 | -1.57461900 | H | 6.26482000  | -1.27701800 | -2.36985000 |
| C | 4.40923300  | 0.67469400  | -2.16583800 | C | 1.92705100  | 0.94945500  | 1.56856700  |
| C | 4.40958500  | -1.43078900 | -0.98542900 | C | 2.52792100  | 2.20147000  | 1.37964900  |
| C | 5.80342500  | 0.68346300  | -2.16177600 | C | 2.55443800  | -0.00365600 | 2.38032500  |
| H | 3.86424000  | 1.49688800  | -2.62567700 | C | 3.73993600  | 2.49831500  | 2.00103600  |
| C | 5.80739800  | -1.42253800 | -0.98183200 | H | 2.03675900  | 2.94436600  | 0.75752300  |
| H | 3.85158200  | -2.24798000 | -0.54243200 | C | 3.76597300  | 0.29754100  | 3.00121400  |
| C | 6.50793700  | -0.36778600 | -1.56773900 | H | 2.07553500  | -0.96499000 | 2.52862900  |
| H | 6.34036000  | 1.50954800  | -2.62140700 | C | 4.36228100  | 1.54677000  | 2.81286100  |
| H | 6.34852200  | -2.24488200 | -0.52019700 | H | 4.19625800  | 3.47369900  | 1.85542100  |
| H | 7.59492400  | -0.36297300 | -1.56428900 | H | 4.24303900  | -0.44299500 | 3.63739100  |
|   |             |             |             | H | 5.30546700  | 1.77976300  | 3.29961100  |

**8-ts**

|    |             |             |             |
|----|-------------|-------------|-------------|
| C  | -1.03067300 | 2.57402100  | 0.18089400  |
| C  | -0.25115500 | 1.70916900  | 0.53167900  |
| C  | 0.62720500  | 0.59698500  | 0.88120400  |
| H  | 1.08383100  | 0.30207500  | -0.32009100 |
| O  | 0.02142100  | -0.50427900 | 1.30309700  |
| Zn | -0.93219500 | -1.64604100 | 0.09885500  |
| I  | -2.83121000 | -3.22721700 | 0.30986200  |
| C  | 1.04204900  | -0.31950500 | -1.55879400 |
| O  | 0.20851600  | -1.30809300 | -1.43662700 |
| H  | 0.66096300  | 0.59456700  | -2.04845100 |
| C  | -1.95465100 | 3.58958700  | -0.20718200 |
| C  | -3.30981000 | 3.26926800  | -0.42391500 |

**9**

|    |             |             |             |
|----|-------------|-------------|-------------|
| C  | 1.90076500  | -0.67578400 | 1.38140200  |
| C  | 1.82023700  | 0.34429400  | 0.71789000  |
| C  | 1.64894000  | 1.47159700  | -0.13860100 |
| O  | 0.78526900  | 1.43976500  | -1.04858700 |
| Zn | -0.60843800 | -0.08224400 | -1.31259800 |
| I  | 0.30632200  | -1.92473300 | -2.75403000 |
| C  | -3.22797400 | -0.18572300 | -0.19383500 |
| O  | -2.01709700 | 0.51773700  | -0.32438500 |
| H  | -3.07668100 | -1.17497000 | 0.27376400  |
| H  | -3.68818300 | -0.38450300 | -1.17850200 |
| C  | 1.98238500  | -1.87573400 | 2.13475900  |

|           |             |             |             |           |             |             |             |
|-----------|-------------|-------------|-------------|-----------|-------------|-------------|-------------|
| C         | 2.74181200  | -1.92714000 | 3.32223200  | H         | -3.21100500 | 1.29347500  | 0.66732100  |
| C         | 1.29980000  | -3.02825400 | 1.69011200  | C         | -5.81172100 | -1.32197900 | -0.51294800 |
| C         | 2.81092900  | -3.11001500 | 4.05032300  | H         | -4.15495700 | -2.69521400 | -0.58513200 |
| H         | 3.26421400  | -1.03781200 | 3.66057000  | C         | -6.22466500 | -0.01557400 | -0.23992100 |
| C         | 1.38103500  | -4.20627000 | 2.42572300  | H         | -5.59816400 | 1.94606400  | 0.39819600  |
| H         | 0.72509700  | -2.98533600 | 0.77020500  | H         | -6.53252900 | -2.06228500 | -0.85141900 |
| C         | 2.13271100  | -4.24883300 | 3.60382400  | H         | -7.26762000 | 0.26563300  | -0.36133400 |
| H         | 3.39358500  | -3.14688800 | 4.96605900  | N         | 1.16080100  | 1.86672500  | 0.08466600  |
| H         | 0.85732900  | -5.09250000 | 2.08014200  | C         | 0.76029100  | 2.33454700  | 1.45108600  |
| H         | 2.19104400  | -5.17097300 | 4.17523600  | H         | 0.97353600  | 3.40842500  | 1.54151000  |
| C         | 2.49078600  | 2.66760700  | 0.04482000  | H         | -0.32263200 | 2.19652400  | 1.51467400  |
| C         | 3.48172200  | 2.71241600  | 1.04032700  | C         | 2.61350700  | 2.13108800  | -0.15549000 |
| C         | 2.29150400  | 3.77897000  | -0.79403200 | H         | 3.16901800  | 1.49697100  | 0.53934100  |
| C         | 4.26285600  | 3.85399400  | 1.19493600  | H         | 2.83466500  | 3.17611700  | 0.10811500  |
| H         | 3.63282200  | 1.85206900  | 1.68470600  | C         | 0.26748700  | 2.49310900  | -0.95013100 |
| C         | 3.07461900  | 4.91654500  | -0.63471300 | H         | 0.52800200  | 2.04343600  | -1.91247600 |
| H         | 1.52238500  | 3.72994900  | -1.55696600 | C         | 1.43314500  | 1.58833000  | 2.60292000  |
| C         | 4.05980600  | 4.95543800  | 0.35859700  | H         | 2.51315200  | 1.75573100  | 2.64511600  |
| H         | 5.02840300  | 3.88679900  | 1.96441500  | H         | 1.25838500  | 0.50645300  | 2.55282400  |
| H         | 2.92015200  | 5.77492900  | -1.28171000 | C         | 3.09552000  | 1.83997000  | -1.57494800 |
| H         | 4.66978600  | 5.84632200  | 0.48033600  | H         | 2.84632700  | 0.81993200  | -1.88414800 |
| C         | -4.23488100 | 0.58560100  | 0.64794000  | H         | 2.69225300  | 2.54202500  | -2.31102400 |
| C         | -4.00444300 | 1.91178100  | 1.02309300  | H         | 4.18673700  | 1.92979400  | -1.59746500 |
| C         | -5.43034800 | -0.03047100 | 1.04252800  | H         | -0.74545900 | 2.15743200  | -0.71443800 |
| C         | -4.95180700 | 2.60997900  | 1.77689200  | C         | 0.31956200  | 4.01981200  | -1.06769600 |
| H         | -3.07531400 | 2.38124900  | 0.71879500  | H         | -0.01891400 | 4.52186100  | -0.15635400 |
| C         | -6.37825200 | 0.66463400  | 1.79283800  | H         | 1.32070800  | 4.39065400  | -1.31209000 |
| H         | -5.62001200 | -1.06498500 | 0.75951600  | H         | -0.35122600 | 4.32838000  | -1.87692500 |
| C         | -6.14138900 | 1.99147100  | 2.16378300  | H         | 1.00638100  | 1.94206300  | 3.54751700  |
| H         | -4.75869200 | 3.64162500  | 2.06248800  |           |             |             |             |
| H         | -7.30032500 | 0.17127900  | 2.09102100  | <b>11</b> |             |             |             |
| H         | -6.87777900 | 2.53528500  | 2.75020300  | Zn        | 1.43220300  | 0.36583800  | -0.02100600 |
|           |             |             |             | I         | 3.03463500  | 1.42742500  | -1.70011700 |
| <b>10</b> |             |             |             | I         | 0.81982000  | -2.41339500 | -0.93174600 |
| Zn        | 0.62837500  | -0.21256700 | 0.05656000  | N         | 2.17401000  | 0.23735200  | 2.01563900  |
| I         | 2.42238800  | -1.97176400 | -0.09677700 | C         | 1.68982300  | 1.46502800  | 2.73127900  |
| C         | -2.07472000 | -1.15958000 | 0.27260600  | H         | 0.59666200  | 1.41192000  | 2.72374000  |
| O         | -1.19807800 | -0.05735200 | 0.22256600  | C         | 1.55981700  | -0.97642000 | 2.65261300  |
| H         | -1.99929100 | -1.67001500 | 1.25025300  | H         | 1.80932700  | -1.83432100 | 2.02640500  |
| H         | -1.82648200 | -1.92068400 | -0.48538200 | C         | 3.67250900  | 0.19136400  | 2.02091400  |
| C         | -3.52268000 | -0.74019300 | 0.06824100  | H         | 4.01310000  | 1.04807200  | 1.43634800  |
| C         | -3.94561300 | 0.56508100  | 0.33982200  | H         | 4.02662400  | 0.33246400  | 3.05248300  |
| C         | -4.47089300 | -1.67750600 | -0.36192600 | C         | 4.27546800  | -1.07738900 | 1.42360200  |
| C         | -5.28583800 | 0.92614200  | 0.18547200  | H         | 5.36217000  | -0.95277200 | 1.37019600  |

|            |             |             |             |           |              |             |             |
|------------|-------------|-------------|-------------|-----------|--------------|-------------|-------------|
| H          | 4.07390400  | -1.96964500 | 2.02412700  | H         | 3.84884400   | 3.25532300  | 1.01387200  |
| H          | 3.91562100  | -1.25211600 | 0.40502500  | C         | 4.02110800   | 2.39494100  | -0.95233300 |
| H          | 2.01637200  | 1.41359800  | 3.77830700  | H         | 4.10602000   | 3.37331600  | -1.43793400 |
| C          | 2.13705000  | 2.79891600  | 2.13552000  | H         | 5.03427900   | 2.00720800  | -0.81413600 |
| H          | 1.64083200  | 3.60480500  | 2.68757200  | H         | 3.49463500   | 1.72649800  | -1.63969400 |
| H          | 3.21545400  | 2.95838200  | 2.22106400  | Zn        | -1.76818300  | -0.05545400 | 0.03562300  |
| H          | 1.86382100  | 2.89827800  | 1.08068000  | H         | 1.18879500   | 2.10750100  | 1.89198200  |
| Zn         | -1.35059700 | -1.09442500 | -0.27683800 | C         | 2.68919500   | 2.60028200  | 3.37116200  |
| I          | -3.69632400 | -1.92535000 | 0.05090900  | H         | 2.92764700   | 3.59366700  | 2.98053000  |
| H          | 0.47489300  | -0.84298800 | 2.58136800  | H         | 1.94247900   | 2.73212800  | 4.16170300  |
| C          | 1.94536900  | -1.27360100 | 4.10606200  | H         | 3.58903300   | 2.18807000  | 3.83879900  |
| H          | 1.64143300  | -0.48435500 | 4.80000800  | C         | -3.65212900  | -0.04402600 | 0.01972700  |
| H          | 1.43488200  | -2.19266700 | 4.41349300  | C         | -4.87633800  | -0.03641300 | -0.00039100 |
| H          | 3.02038600  | -1.44147400 | 4.22514700  | C         | -6.30406100  | -0.02832700 | -0.02551600 |
| C          | -0.55915600 | 0.80396700  | 0.10136000  | C         | -7.03698700  | -1.07874500 | 0.56220000  |
| C          | -1.44793300 | 1.66894800  | 0.09164800  | C         | -7.00343600  | 1.02972300  | -0.63988500 |
| C          | -2.47580800 | 2.65034100  | 0.06420800  | C         | -8.42930900  | -1.06766100 | 0.53337200  |
| C          | -3.25218100 | 2.90606400  | 1.21399300  | H         | -6.50109500  | -1.89571600 | 1.03555100  |
| C          | -2.72387900 | 3.37697400  | -1.11983500 | C         | -8.39588100  | 1.03359200  | -0.66297000 |
| C          | -4.25576500 | 3.86861700  | 1.17467300  | H         | -6.44156600  | 1.83975000  | -1.09473700 |
| H          | -3.06274900 | 2.33967000  | 2.12018200  | C         | -9.11314200  | -0.01328100 | -0.07778500 |
| C          | -3.72626100 | 4.34130100  | -1.14513900 | H         | -8.98296500  | -1.88422700 | 0.98903600  |
| H          | -2.12411400 | 3.17507300  | -2.00160800 | H         | -8.92346900  | 1.85524100  | -1.13997100 |
| C          | -4.49229600 | 4.58701900  | -0.00143300 | H         | -10.19957200 | -0.00776500 | -0.09843600 |
| H          | -4.85578700 | 4.05909100  | 2.05958100  | I         | -0.07410000  | 1.48904800  | -1.34801100 |
| H          | -3.91385200 | 4.90000800  | -2.05723000 |           |              |             |             |
| H          | -5.27667900 | 5.33825400  | -0.02726100 |           |              |             |             |
|            |             |             |             | <b>12</b> |              |             |             |
|            |             |             |             | Zn        | 1.77382800   | 0.36589700  | -0.00005400 |
| <b>11a</b> |             |             |             | I         | 4.03026000   | 1.40388200  | -0.00007500 |
| Zn         | 1.89290400  | -0.05562700 | -0.12739400 | I         | 1.34757800   | -2.36210600 | 0.00017700  |
| I          | 3.29016700  | -1.60655600 | -1.58558700 | Zn        | -0.97361300  | -1.03701900 | -0.00003800 |
| I          | 0.00110200  | -1.47997000 | 1.39990700  | I         | -3.31485500  | -1.89442700 | -0.00013100 |
| N          | 2.97615000  | 1.32555300  | 1.13642300  | C         | -0.15184700  | 0.89093300  | -0.00007600 |
| C          | 3.27285000  | 2.58247100  | 0.36593800  | C         | -1.01986300  | 1.77817200  | -0.00001300 |
| H          | 2.30840700  | 3.06082800  | 0.17170900  | C         | -2.03578400  | 2.76621200  | 0.00006100  |
| C          | 2.09896500  | 1.66581000  | 2.30999700  | C         | -2.54207000  | 3.26162400  | 1.22145700  |
| H          | 1.80156900  | 0.72556200  | 2.77652900  | C         | -2.54198900  | 3.26184800  | -1.22128000 |
| C          | 4.26198500  | 0.67186300  | 1.55330400  | C         | -3.53645000  | 4.23336900  | 1.21430900  |
| H          | 4.77504300  | 0.38050000  | 0.63501800  | H         | -2.14803000  | 2.87656000  | 2.15639600  |
| H          | 4.88795000  | 1.42167800  | 2.05717300  | C         | -3.53636400  | 4.23360000  | -1.21402400 |
| C          | 4.10186400  | -0.56081200 | 2.43902900  | H         | -2.14788400  | 2.87696100  | -2.15626400 |
| H          | 5.09027600  | -1.00640700 | 2.59283600  | C         | -4.03311500  | 4.71864300  | 0.00017000  |
| H          | 3.68692300  | -0.32802300 | 3.42425900  | H         | -3.92661300  | 4.61329800  | 2.15360400  |
| H          | 3.47400000  | -1.32174100 | 1.96461300  | H         | -3.92645300  | 4.61370500  | -2.15327800 |

|              |             |             |             |           |             |             |             |
|--------------|-------------|-------------|-------------|-----------|-------------|-------------|-------------|
| H            | -4.81068400 | 5.47722600  | 0.00021700  | C         | -1.12562500 | 3.27676600  | -1.35214600 |
|              |             |             |             | C         | -2.31073800 | 4.03188700  | -1.19124000 |
| <b>13</b>    |             |             |             | C         | -0.09504100 | 3.76970400  | -2.18568300 |
| Zn           | 0.95125200  | 1.06994400  | -0.24280800 | C         | -2.45395300 | 5.24889600  | -1.84736000 |
| I            | 2.46749400  | 3.06929100  | -0.61123600 | H         | -3.10054700 | 3.64530700  | -0.55495700 |
| I            | 0.42587100  | -0.65619400 | -2.51470300 | C         | -0.24958800 | 4.98962400  | -2.83411000 |
| Zn           | -1.51545200 | -0.74406100 | -0.73417600 | H         | 0.81114800  | 3.18526900  | -2.31082600 |
| I            | -3.40700800 | -2.37305700 | -0.49582900 | C         | -1.42586800 | 5.72849600  | -2.66647400 |
| C            | -0.90917500 | 0.86999000  | 0.47989400  | H         | -3.36576200 | 5.82568400  | -1.72422200 |
| C            | -1.92439600 | 1.21697600  | 1.10021300  | H         | 0.54385200  | 5.36653600  | -3.47244400 |
| C            | -3.09639000 | 1.59565700  | 1.81063200  | H         | -1.54255000 | 6.68001100  | -3.17759900 |
| C            | -3.42507700 | 0.96295600  | 3.02759500  | C         | -2.60936500 | -0.11911000 | 4.17044600  |
| C            | -3.93520400 | 2.60992900  | 1.30301800  | C         | -3.18030300 | 1.11688700  | 4.48643600  |
| C            | -4.57298500 | 1.33939400  | 3.71750500  | C         | -2.69823900 | 2.28382600  | 3.88634800  |
| H            | -2.77787500 | 0.18119400  | 3.41177200  | C         | -1.65473800 | 2.21161000  | 2.96613500  |
| C            | -5.07813600 | 2.98068900  | 2.00404800  | C         | -1.08079500 | 0.97374000  | 2.64478000  |
| H            | -3.67637300 | 3.09429600  | 0.36685100  | C         | -1.56057800 | -0.19282400 | 3.25522700  |
| C            | -5.39839000 | 2.34661000  | 3.20841600  | H         | -2.97883700 | -1.02582000 | 4.64077800  |
| H            | -4.82641400 | 0.84759900  | 4.65196900  | H         | -3.99693300 | 1.17126900  | 5.20096900  |
| H            | -5.72169400 | 3.76237600  | 1.61149600  | H         | -3.13524300 | 3.24652300  | 4.13635900  |
| H            | -6.29378100 | 2.63735800  | 3.75069200  | H         | -1.28181200 | 3.11705000  | 2.49210800  |
| C            | 4.12672400  | -3.56458900 | 2.76668500  | H         | -1.09751000 | -1.14542500 | 3.01916200  |
| C            | 5.51191200  | -3.41574800 | 2.92025500  | C         | 0.05861500  | 0.91518400  | 1.68243300  |
| C            | 6.16520200  | -2.27757400 | 2.43868700  | H         | 0.56792300  | 1.87457800  | 1.54452500  |
| C            | 5.43170800  | -1.28203000 | 1.79922800  | O         | 0.80124400  | -0.15552400 | 1.69682400  |
| C            | 4.04151300  | -1.42499200 | 1.64382200  |           |             |             |             |
| C            | 3.38919400  | -2.57389600 | 2.13143100  | <b>15</b> |             |             |             |
| H            | 3.63148000  | -4.45458700 | 3.14313000  | Zn        | 2.29146900  | -0.05481500 | -0.52861600 |
| H            | 6.08391600  | -4.19406500 | 3.41789500  | I         | 4.20270200  | -1.58153600 | -0.94061000 |
| H            | 7.23866700  | -2.17106500 | 2.56123100  | I         | 1.76866600  | 2.53864600  | -0.66846900 |
| H            | 5.92645400  | -0.39210200 | 1.41776900  | Zn        | -0.52228000 | 1.25567300  | 0.13046400  |
| H            | 2.31614200  | -2.66748500 | 1.99917400  | I         | -2.64675700 | 2.35656000  | 0.77010500  |
| C            | 3.30202200  | -0.36758400 | 0.97049300  | O         | 0.43994900  | -0.41110800 | -0.02700400 |
| H            | 3.87900200  | 0.49491100  | 0.59968900  | C         | -0.10443900 | -1.72452600 | 0.33751900  |
| O            | 2.07480200  | -0.39147100 | 0.80000700  | H         | 0.55054900  | -2.45784600 | -0.14931800 |
|              |             |             |             | C         | -1.45228000 | -1.84705300 | -0.21143900 |
| <b>14-ts</b> |             |             |             | C         | -2.56501700 | -1.93653000 | -0.68924800 |
| Zn           | 2.24644300  | -0.51516100 | 0.47405700  | C         | -3.87457800 | -2.04612800 | -1.24939400 |
| I            | 4.59269800  | 0.32046000  | 0.47295200  | C         | -5.00039600 | -1.61677700 | -0.51991800 |
| I            | 1.03721700  | -2.10728100 | -1.26368500 | C         | -4.05438200 | -2.58481700 | -2.53837800 |
| Zn           | -1.30942900 | -0.88808600 | -0.55702200 | C         | -6.27431000 | -1.72395700 | -1.07212500 |
| I            | -3.41692000 | -2.21587900 | -0.76834200 | H         | -4.86254900 | -1.19959400 | 0.47251400  |
| C            | -0.84294000 | 0.98099700  | -0.04144600 | C         | -5.33245600 | -2.69002000 | -3.08110900 |
| C            | -0.97631100 | 2.04160600  | -0.68143000 | H         | -3.18696300 | -2.91550000 | -3.10125600 |

|           |             |             |             |              |             |             |             |
|-----------|-------------|-------------|-------------|--------------|-------------|-------------|-------------|
| C         | -6.44400100 | -2.26026800 | -2.35128900 | H            | 1.11993200  | -2.80010500 | 2.75677600  |
| H         | -7.13657000 | -1.38781200 | -0.50322700 | C            | 4.51194900  | -2.54714000 | 2.88279400  |
| H         | -5.46175200 | -3.10707500 | -4.07588900 | H            | 5.63674900  | -0.78024900 | 2.36894200  |
| H         | -7.43954100 | -2.34224000 | -2.77861400 | H            | 3.12328400  | -4.13837600 | 3.33287600  |
| C         | -0.01615700 | -1.91910900 | 1.84222200  | H            | 5.39147800  | -3.13270500 | 3.13655600  |
| C         | -1.01843500 | -1.45053800 | 2.70197500  | C            | -3.52653700 | 0.63982600  | -0.11084300 |
| C         | 1.12324100  | -2.52766500 | 2.38439000  | H            | -4.14304100 | -0.10273300 | 0.42154100  |
| C         | -0.87357500 | -1.57589100 | 4.08399400  | O            | -2.33029500 | 0.39362600  | -0.32156400 |
| H         | -1.91744700 | -1.00238600 | 2.28801500  | C            | -4.17865500 | 1.87121200  | -0.52909000 |
| C         | 1.26559800  | -2.65621700 | 3.76687300  | C            | -5.54616400 | 2.04134300  | -0.24875900 |
| H         | 1.90024000  | -2.90367800 | 1.72237000  | C            | -3.46341200 | 2.87808500  | -1.20606600 |
| C         | 0.26823700  | -2.17763500 | 4.61891800  | C            | -6.19561000 | 3.20779100  | -0.64281600 |
| H         | -1.65662600 | -1.21041100 | 4.74256200  | H            | -6.08951900 | 1.25793600  | 0.27413900  |
| H         | 2.15185100  | -3.13327800 | 4.17588000  | C            | -4.11700900 | 4.03993600  | -1.59562400 |
| H         | 0.37680400  | -2.27879000 | 5.69522500  | H            | -2.40852400 | 2.72863000  | -1.41211400 |
| <b>16</b> |             |             |             | C            | -5.48034500 | 4.20348800  | -1.31479000 |
| Zn        | -1.32030300 | -1.39575000 | 0.16813600  | H            | -7.25152800 | 3.34320000  | -0.42978500 |
| I         | -2.76149900 | -2.68721600 | 1.80429200  | H            | -3.57262100 | 4.82106000  | -2.11758000 |
| I         | -0.46132500 | -2.04636600 | -2.34539000 | H            | -5.98676600 | 5.11411700  | -1.62285500 |
| Zn        | 1.47414700  | -0.62822300 | -1.11760900 | <b>17-ts</b> |             |             |             |
| I         | 3.47786500  | 0.43812600  | -2.13951600 | Zn           | -2.17238600 | 0.47964300  | -0.83151000 |
| O         | 0.50948600  | -0.74713500 | 0.54846700  | I            | -4.46341800 | 0.96557300  | 0.07816300  |
| C         | 0.98139300  | -0.27544100 | 1.83978000  | I            | -1.72114700 | -2.04338000 | -1.92012100 |
| H         | 0.19209900  | -0.53865100 | 2.55713600  | Zn           | -0.10530700 | -1.91506800 | 0.11236600  |
| C         | 1.12581900  | 1.18256200  | 1.81603100  | I            | 1.28669900  | -3.57215100 | 1.34742100  |
| C         | 1.22088200  | 2.39142100  | 1.76194900  | O            | -0.54681500 | -0.03459500 | 0.64547300  |
| C         | 1.34216500  | 3.81426500  | 1.69809900  | C            | 0.34287800  | 0.85850100  | 1.07555100  |
| C         | 2.10883100  | 4.41848300  | 0.68219100  | H            | 0.20268800  | 1.91257800  | 0.07334500  |
| C         | 0.69888100  | 4.63066700  | 2.64857800  | C            | 1.72560200  | 0.58337200  | 0.80306900  |
| C         | 2.22431400  | 5.80543300  | 0.62288900  | C            | 2.88261100  | 0.37996400  | 0.48118100  |
| H         | 2.60699700  | 3.79117300  | -0.05100100 | C            | 4.24389700  | 0.14478000  | 0.13360100  |
| C         | 0.82294900  | 6.01647300  | 2.58255800  | C            | 4.72923900  | -1.17105400 | -0.00481100 |
| H         | 0.10929400  | 4.16687400  | 3.43356400  | C            | 5.11279300  | 1.23489000  | -0.07508200 |
| C         | 1.58413900  | 6.60798400  | 1.57090200  | C            | 6.06341400  | -1.38448600 | -0.34033700 |
| H         | 2.81872900  | 6.26074200  | -0.16451100 | H            | 4.05799900  | -2.00782400 | 0.16112800  |
| H         | 0.32495800  | 6.63649000  | 3.32309600  | C            | 6.44339800  | 1.00648300  | -0.41368600 |
| H         | 1.67933200  | 7.68932900  | 1.52274200  | H            | 4.73090800  | 2.24649900  | 0.01854000  |
| C         | 2.24321900  | -1.03364800 | 2.23190000  | C            | 6.92160800  | -0.30035800 | -0.54475400 |
| C         | 3.52012000  | -0.47107000 | 2.12982900  | H            | 6.43449900  | -2.40024400 | -0.44177200 |
| C         | 2.11077500  | -2.35980000 | 2.67022700  | H            | 7.10919700  | 1.84932800  | -0.57598900 |
| C         | 4.64988500  | -1.22706000 | 2.45263100  | H            | 7.96165000  | -0.47364300 | -0.80670600 |
| H         | 3.62870200  | 0.55915600  | 1.80554800  | C            | -0.00397500 | 1.67099000  | 2.28071700  |
| C         | 3.23815400  | -3.11305600 | 2.99202600  | C            | 0.93444200  | 2.56307700  | 2.82808900  |

|           |             |             |             |           |             |             |             |
|-----------|-------------|-------------|-------------|-----------|-------------|-------------|-------------|
| C         | -1.27806700 | 1.56219400  | 2.85839500  | C         | 0.50017400  | 1.47591300  | -0.70170900 |
| C         | 0.59963900  | 3.33422200  | 3.93722000  | C         | -0.49503700 | 2.52504600  | -0.92427700 |
| H         | 1.92302600  | 2.64159400  | 2.38576200  | C         | -0.11906000 | 3.88340200  | -0.92826100 |
| C         | -1.60526800 | 2.33701400  | 3.97046500  | C         | -1.84080100 | 2.16631900  | -1.14771400 |
| H         | -2.00252200 | 0.87141000  | 2.44319200  | C         | -1.07322000 | 4.86659600  | -1.15876300 |
| C         | -0.67141300 | 3.22380000  | 4.51037600  | H         | 0.91748000  | 4.15433500  | -0.75526900 |
| H         | 1.33095000  | 4.01767700  | 4.35917500  | C         | -2.78924000 | 3.15826600  | -1.37320300 |
| H         | -2.59176300 | 2.24362800  | 4.41483000  | H         | -2.13621500 | 1.12200800  | -1.11959300 |
| H         | -0.93003800 | 3.82486300  | 5.37761500  | C         | -2.40671800 | 4.50417300  | -1.38149200 |
| C         | -0.21490100 | 2.51068000  | -0.95423900 | H         | -0.78313600 | 5.91298200  | -1.16503500 |
| H         | -0.82282600 | 3.26980400  | -0.42533600 | H         | -3.82535800 | 2.87849100  | -1.53652700 |
| O         | -0.87658700 | 1.62103500  | -1.67304100 | H         | -3.15131900 | 5.27535500  | -1.55962200 |
| C         | 1.05317000  | 3.06178400  | -1.52542200 | C         | 1.84333900  | 1.81212100  | -0.39847300 |
| C         | 1.63462800  | 4.20232200  | -0.95029100 | C         | 3.00918300  | 2.03594100  | -0.11435100 |
| C         | 1.68518900  | 2.43348900  | -2.60756700 | C         | 4.36435100  | 2.28846600  | 0.21435200  |
| C         | 2.82846100  | 4.71402300  | -1.45688200 | C         | 4.78387900  | 3.59373500  | 0.55002700  |
| H         | 1.14334600  | 4.69363100  | -0.11293400 | C         | 5.29983300  | 1.23100000  | 0.20924900  |
| C         | 2.87704800  | 2.94881600  | -3.11442900 | C         | 6.11392500  | 3.83080300  | 0.87777700  |
| H         | 1.22077500  | 1.55799200  | -3.04912300 | H         | 4.05968300  | 4.40217600  | 0.55507600  |
| C         | 3.45147000  | 4.08729300  | -2.54078000 | C         | 6.62838600  | 1.48370000  | 0.53431800  |
| H         | 3.26638900  | 5.60569800  | -1.01649500 | H         | 4.97250200  | 0.23182600  | -0.05977100 |
| H         | 3.35793100  | 2.46510100  | -3.96012300 | C         | 7.03584800  | 2.77866700  | 0.86969400  |
| H         | 4.37753900  | 4.49016700  | -2.94207400 | H         | 6.43474100  | 4.83453200  | 1.13998300  |
|           |             |             |             | H         | 7.34766500  | 0.67031600  | 0.52717900  |
| <b>18</b> |             |             |             | H         | 8.07433500  | 2.96921100  | 1.12543000  |
| Zn        | -1.81990000 | -0.85164300 | 1.41769200  | Zn        | 1.19693200  | -1.45048100 | -0.82192200 |
| I         | -0.94693800 | 0.36739400  | 3.43200500  | I         | 3.19484300  | -1.74782300 | -2.29218400 |
| I         | -0.15688700 | -3.02314500 | 0.69935500  |           |             |             |             |
| O         | -3.15321900 | -0.80299900 | 0.16107000  | <b>19</b> |             |             |             |
| C         | -4.41905200 | -0.25031000 | 0.45055100  | Zn        | 0.33858300  | -0.55419500 | -0.61062500 |
| H         | -5.05820400 | -1.00232300 | 0.94711900  | I         | 1.38673200  | -2.66125900 | -1.56366500 |
| H         | -4.35897000 | 0.60425600  | 1.14577000  | I         | -0.09294400 | -0.02983100 | 2.08145900  |
| C         | -5.12490800 | 0.21325200  | -0.81488300 | Zn        | -2.31926900 | 0.58295300  | 0.71558000  |
| C         | -6.13470000 | 1.18333500  | -0.74606600 | I         | -4.31363900 | 1.88661500  | 1.44464600  |
| C         | -4.80324700 | -0.33693700 | -2.06128500 | O         | -1.56440800 | -0.09961600 | -0.91766400 |
| C         | -6.81261400 | 1.59256100  | -1.89633500 | C         | -2.32327100 | -0.45017100 | -2.09300600 |
| H         | -6.39203100 | 1.62215900  | 0.21665300  | H         | -1.62836900 | -0.92503200 | -2.79609200 |
| C         | -5.47686600 | 0.07437300  | -3.21387900 | C         | -3.46847000 | -1.38189400 | -1.77325800 |
| H         | -4.01647300 | -1.08249600 | -2.11314100 | C         | -3.21542700 | -2.70642900 | -1.38133800 |
| C         | -6.48359900 | 1.03912000  | -3.13669700 | C         | -4.79440100 | -0.93732700 | -1.84533600 |
| H         | -7.59369900 | 2.34563900  | -1.82474700 | C         | -4.26880600 | -3.56253000 | -1.06383700 |
| H         | -5.21470000 | -0.36103100 | -4.17514000 | H         | -2.18960400 | -3.06445500 | -1.33223200 |
| H         | -7.00723100 | 1.35830300  | -4.03412400 | C         | -5.85131900 | -1.79564700 | -1.53146500 |
| O         | 0.15283000  | 0.25552300  | -0.77546800 | H         | -5.00080900 | 0.08660000  | -2.14801400 |

|             |             |             |             |             |             |             |             |
|-------------|-------------|-------------|-------------|-------------|-------------|-------------|-------------|
| C           | -5.58954500 | -3.10850800 | -1.13882000 | C           | 5.70285900  | -1.69999900 | 0.76671900  |
| H           | -4.06096500 | -4.58632100 | -0.76443200 | H           | 4.16053700  | -2.55775300 | 2.00245200  |
| H           | -6.87504500 | -1.43636000 | -1.59083600 | C           | 5.99159900  | -0.99552100 | -0.40296100 |
| H           | -6.40993600 | -3.77767200 | -0.89350500 | H           | 5.16641500  | -0.06311000 | -2.16459700 |
| C           | 2.39230800  | 1.66120100  | -0.98546000 | H           | 6.50526000  | -1.99548800 | 1.43802500  |
| O           | 1.23852400  | 1.20937200  | -1.20348600 | H           | 7.01942400  | -0.74261300 | -0.64989000 |
| C           | 2.75318800  | 3.00680000  | -1.46996500 | C           | 0.46670000  | 5.48233900  | -0.72863000 |
| C           | 4.03962200  | 3.53411300  | -1.26267000 | C           | 0.05831700  | 4.20762000  | -1.12848700 |
| C           | 1.78689400  | 3.77176500  | -2.14854400 | C           | -0.75371300 | 3.42810400  | -0.29723500 |
| C           | 4.35464500  | 4.80756500  | -1.72741700 | C           | -1.14821100 | 3.93945800  | 0.94815400  |
| H           | 4.78295900  | 2.94156300  | -0.73901200 | C           | -0.73628700 | 5.20792100  | 1.35104600  |
| C           | 2.10701900  | 5.04355100  | -2.60977800 | C           | 0.07075400  | 5.98278700  | 0.51178600  |
| H           | 0.79802300  | 3.35381100  | -2.30101600 | H           | 1.09490300  | 6.07934800  | -1.38384100 |
| C           | 3.38971000  | 5.56254400  | -2.40028800 | H           | 0.37040500  | 3.81745300  | -2.09486800 |
| H           | 5.34930800  | 5.21229900  | -1.56598500 | H           | -1.77409700 | 3.33603700  | 1.60078100  |
| H           | 1.35972900  | 5.63384300  | -3.13169600 | H           | -1.04666700 | 5.59582200  | 2.31734700  |
| H           | 3.63630600  | 6.55703600  | -2.76175400 | H           | 0.38862400  | 6.97313500  | 0.82603400  |
| H           | -2.70038100 | 0.46906100  | -2.55814100 | C           | -1.19100500 | 2.05068900  | -0.72440000 |
| C           | 3.35084400  | 0.88951800  | -0.27411100 | H           | -0.86973900 | 1.83773800  | -1.75079200 |
| C           | 4.12736200  | 0.17152400  | 0.33375700  | O           | -0.67793400 | 1.03046200  | 0.17164700  |
| C           | 5.00854600  | -0.68578500 | 1.04074200  | H           | 0.30074900  | 1.04913400  | 0.20136800  |
| C           | 6.26542400  | -0.21799100 | 1.47929400  | H           | -2.27604000 | 1.93078800  | -0.67148300 |
| C           | 4.62381900  | -2.01765900 | 1.30834100  |             |             |             |             |
| C           | 7.11686500  | -1.06809300 | 2.17614600  | <b>10-c</b> |             |             |             |
| H           | 6.55594200  | 0.80700300  | 1.27098600  | Zn          | -0.24267700 | -0.82733400 | 0.01377500  |
| C           | 5.48708000  | -2.85785200 | 2.00452800  | I           | 0.97116300  | -3.02537200 | 0.02728000  |
| H           | 3.66106900  | -2.37373400 | 0.95585300  | C           | -3.05874000 | -0.40773100 | -0.04108900 |
| C           | 6.72950600  | -2.38631400 | 2.43922900  | O           | -1.76632600 | 0.15196900  | 0.00110200  |
| H           | 8.08297100  | -0.70598700 | 2.51514000  | H           | -3.23324800 | -1.07725800 | 0.82010400  |
| H           | 5.19056400  | -3.88243900 | 2.20804900  | H           | -3.20479600 | -1.02678900 | -0.94267500 |
| H           | 7.39848400  | -3.04708400 | 2.98345900  | C           | -4.13081800 | 0.67204600  | -0.02649100 |
|             |             |             |             | C           | -3.82110300 | 2.00038700  | 0.27767300  |
| <b>10-b</b> |             |             |             | C           | -5.46316400 | 0.33361300  | -0.29899300 |
| Zn          | -0.81661400 | -1.09029900 | 0.12156300  | C           | -4.82470700 | 2.97222400  | 0.31079100  |
| I           | -3.08227700 | -2.05826200 | -0.12336900 | H           | -2.78726700 | 2.25859400  | 0.47969600  |
| C           | 1.89940600  | -2.03715100 | 0.55773600  | C           | -6.46690400 | 1.30121400  | -0.26377400 |
| O           | 1.00422500  | -0.99028200 | 0.23835400  | H           | -5.71664200 | -0.69690700 | -0.54356000 |
| H           | 1.64801800  | -2.95214100 | -0.00609300 | C           | -6.15007700 | 2.62776600  | 0.04211500  |
| H           | 1.83624200  | -2.30167000 | 1.62519500  | H           | -4.56882600 | 4.00268400  | 0.54682500  |
| C           | 3.33054300  | -1.64568100 | 0.23594200  | H           | -7.49535200 | 1.02190800  | -0.47970100 |
| C           | 3.63050000  | -0.93823200 | -0.93533000 | H           | -6.93003300 | 3.38460300  | 0.06714600  |
| C           | 4.38004800  | -2.01750300 | 1.08357500  | C           | 5.71973400  | 2.35918900  | -0.05333100 |
| C           | 4.94947100  | -0.61349000 | -1.25221500 | C           | 4.78474900  | 1.32812100  | -0.03209500 |
| H           | 2.81884300  | -0.63931100 | -1.59221600 | C           | 3.41084000  | 1.62726300  | -0.02327400 |

|            |             |             |             |            |             |             |             |
|------------|-------------|-------------|-------------|------------|-------------|-------------|-------------|
| C          | 2.97679900  | 2.96696000  | -0.03621900 | C          | -2.54492100 | -0.41554900 | 1.60009200  |
| C          | 3.91477400  | 3.99112600  | -0.05766900 | H          | -2.72132300 | -0.99101900 | 0.69009800  |
| C          | 5.28306500  | 3.68716100  | -0.06612000 | C          | -0.48227100 | 2.77045300  | 2.27189900  |
| H          | 6.78161200  | 2.13323400  | -0.06017900 | H          | -1.10295900 | 3.59118700  | 1.90214300  |
| H          | 5.10917200  | 0.29032400  | -0.02228300 | H          | 0.35130600  | 2.64787800  | 1.57665400  |
| H          | 1.91173000  | 3.17551400  | -0.02990500 | C          | -3.22060800 | 1.16316400  | -0.84164800 |
| H          | 3.58914600  | 5.02694500  | -0.06822200 | H          | -2.50645300 | 0.68305700  | -1.51494500 |
| H          | 6.01215700  | 4.49260000  | -0.08303900 | H          | -3.99646100 | 0.43429500  | -0.58869300 |
| C          | 2.45603900  | 0.52925500  | -0.00236500 | H          | -3.69938800 | 1.98107000  | -1.39119900 |
| H          | 2.86484100  | -0.49440800 | 0.00287500  | H          | -1.89758600 | -1.03069500 | 2.23352100  |
| O          | 1.22798200  | 0.69080000  | 0.00875800  | C          | -3.87782600 | -0.17829500 | 2.32289600  |
| <b>1-a</b> |             |             |             | H          | -3.76319400 | 0.31455600  | 3.29304600  |
| Zn         | -0.00008500 | -0.00004700 | -0.06784600 | H          | -4.57983200 | 0.40756300  | 1.72214000  |
| I          | 0.83630700  | 2.06187400  | -1.46356500 | H          | -4.34203000 | -1.15355200 | 2.50702400  |
| N          | -1.73790200 | 0.79055000  | 1.21488300  | H          | -0.08231300 | 3.07709000  | 3.24534300  |
| N          | 1.73760400  | -0.79079600 | 1.21496100  | I          | -0.83602500 | -2.06174200 | -1.46392200 |
| C          | 1.28235900  | -1.48308300 | 2.46324800  | <b>1-b</b> |             |             |             |
| H          | 2.16075200  | -1.71386200 | 3.08166000  | Zn         | 1.69493400  | -0.13722800 | -0.03736200 |
| H          | 0.68728800  | -0.75685400 | 3.02624000  | I          | 1.12995100  | -2.61162700 | -0.19068500 |
| C          | 0.48169400  | -2.77080800 | 2.27169500  | N          | 0.49887600  | 1.04550500  | -1.37361200 |
| H          | -0.35405700 | -2.64697300 | 1.57931000  | C          | -0.87499500 | 1.10729800  | -0.76901000 |
| H          | 1.10116700  | -3.59096600 | 1.89867900  | H          | -1.49741100 | 1.77650300  | -1.37711500 |
| H          | 0.08461800  | -3.07906800 | 3.24581600  | H          | -1.30403600 | 0.10391700  | -0.84278200 |
| C          | 2.53417700  | -1.75574300 | 0.38562700  | C          | -0.91809000 | 1.56014100  | 0.68880900  |
| H          | 3.27857500  | -2.23927100 | 1.03633600  | H          | -0.31900600 | 0.91332200  | 1.34167700  |
| H          | 1.83923800  | -2.52807200 | 0.05203700  | H          | -0.57797900 | 2.59031200  | 0.82867500  |
| C          | 3.22118000  | -1.16250500 | -0.84113000 | H          | -1.95355900 | 1.49413700  | 1.03705200  |
| H          | 2.50736900  | -0.68191000 | -1.51444100 | C          | 1.06729100  | 2.42744900  | -1.50566700 |
| H          | 3.99708700  | -0.43391900 | -0.58750100 | H          | 0.32222200  | 3.06683600  | -1.99986700 |
| H          | 3.70002100  | -1.98020800 | -1.39092800 | H          | 1.20425000  | 2.80939200  | -0.49200900 |
| C          | 2.54439900  | 0.41540500  | 1.60041600  | C          | 2.39859800  | 2.50740200  | -2.24924400 |
| H          | 2.72110900  | 0.99076800  | 0.69041600  | H          | 3.14874700  | 1.84049800  | -1.81207200 |
| H          | 1.89680700  | 1.03061800  | 2.23352800  | H          | 2.30305600  | 2.28135700  | -3.31549700 |
| C          | 3.87709200  | 0.17831100  | 2.32366600  | H          | 2.78466800  | 3.52823800  | -2.16082600 |
| H          | 4.34132500  | 1.15359600  | 2.50757000  | C          | 0.44248400  | 0.31993100  | -2.68912000 |
| H          | 3.76215000  | -0.31417300 | 3.29396200  | H          | 1.47199100  | 0.20056900  | -3.03737000 |
| H          | 4.57921000  | -0.40783200 | 1.72331300  | H          | 0.07100300  | -0.68446200 | -2.47063800 |
| C          | -1.28233700 | 1.48231600  | 2.46336300  | C          | -0.40522600 | 0.96488500  | -3.78990800 |
| H          | -2.16046900 | 1.71234200  | 3.08241600  | H          | -0.33673400 | 0.34106000  | -4.68764700 |
| H          | -0.68667900 | 0.75597200  | 3.02557300  | H          | -1.46299600 | 1.03029900  | -3.51866700 |
| C          | -2.53419700 | 1.75584900  | 0.38571600  | H          | -0.05616300 | 1.96692000  | -4.05941900 |
| H          | -1.83914700 | 2.52836400  | 0.05282000  | I          | 3.34310200  | 1.09189600  | 1.43687100  |
| H          | -3.27892600 | 2.23905800  | 1.03629000  | C          | -3.97168000 | -1.10761300 | 0.57791400  |



|            |             |             |             |            |             |             |             |
|------------|-------------|-------------|-------------|------------|-------------|-------------|-------------|
| C          | -2.96280700 | -1.77822300 | 0.56138700  | C          | -4.84412700 | -1.24092100 | -0.35671600 |
| H          | -2.07110700 | -2.36751500 | 0.55288400  | C          | -6.23307500 | 1.17749300  | -0.33542700 |
| C          | -5.16247400 | -0.31549400 | 0.60178500  | H          | -4.28905500 | 2.11411300  | -0.30388200 |
| C          | -6.03397800 | -0.29955400 | -0.50428300 | C          | -6.23720200 | -1.23502900 | -0.37151100 |
| C          | -5.48071000 | 0.45991300  | 1.73374700  | H          | -4.29676900 | -2.17885700 | -0.36981800 |
| C          | -7.19176500 | 0.47446000  | -0.47543800 | C          | -6.94122600 | -0.02751900 | -0.36021200 |
| H          | -5.79386000 | -0.90042500 | -1.37609900 | H          | -6.77008100 | 2.12367500  | -0.32916300 |
| C          | -6.64037200 | 1.23151400  | 1.75388900  | H          | -6.77749600 | -2.17913300 | -0.39396300 |
| H          | -4.81457700 | 0.44328300  | 2.59100100  | H          | -8.02864800 | -0.02548900 | -0.37266300 |
| C          | -7.49844500 | 1.24204500  | 0.65123400  |            |             |             |             |
| H          | -7.85799200 | 0.47728200  | -1.33383800 | <b>2-b</b> |             |             |             |
| H          | -6.87639300 | 1.82402200  | 2.63356900  | Zn         | 0.00150600  | 0.67260500  | -0.12812700 |
| H          | -8.40301700 | 1.84360200  | 0.67071500  | I          | 0.21271300  | -0.78851500 | 1.93497700  |
|            |             |             |             | N          | 0.47054000  | 2.74431400  | -0.01922000 |
| <b>1-c</b> |             |             |             | C          | -0.73847000 | 3.52195700  | 0.43289600  |
| Zn         | 0.51312000  | 0.03722700  | -0.27668100 | H          | -0.45664600 | 4.57881800  | 0.51024900  |
| I          | 1.75721100  | -1.96255500 | -1.58470300 | H          | -1.47544400 | 3.43522500  | -0.36991200 |
| N          | 1.06628000  | -0.49134000 | 1.95417700  | C          | 1.58943900  | 2.92911200  | 0.96912200  |
| C          | 2.44388000  | -1.04409300 | 2.07859200  | H          | 1.24815900  | 2.49909300  | 1.91257700  |
| H          | 2.61583300  | -1.36008100 | 3.12127400  | H          | 1.73541100  | 4.00450400  | 1.13296800  |
| H          | 2.47680600  | -1.93719300 | 1.44839100  | C          | 0.85236200  | 3.19302500  | -1.40615800 |
| C          | 3.57449800  | -0.10823600 | 1.65600400  | H          | 1.64522900  | 2.52704300  | -1.75406600 |
| H          | 3.44176500  | 0.24313300  | 0.63055800  | C          | -1.36107200 | 3.06994900  | 1.75156400  |
| H          | 3.66785800  | 0.76520300  | 2.30949700  | H          | -0.70228800 | 3.22790100  | 2.60944800  |
| H          | 4.51851800  | -0.66445800 | 1.70749700  | H          | -1.65139800 | 2.01499600  | 1.73719100  |
| C          | 0.91807800  | 0.71529900  | 2.81312000  | C          | 2.91032400  | 2.27422600  | 0.57605400  |
| H          | 1.29947900  | 0.49517200  | 3.82600700  | H          | 2.79689000  | 1.19938700  | 0.39620800  |
| H          | 1.56233800  | 1.48496500  | 2.38270900  | H          | 3.36803700  | 2.73366000  | -0.30523400 |
| C          | -0.50001100 | 1.27690300  | 2.90943200  | H          | 3.61296900  | 2.38767400  | 1.40778200  |
| H          | -0.92855800 | 1.45195700  | 1.91946900  | H          | -0.02344000 | 3.00273600  | -2.03524900 |
| H          | -1.17809400 | 0.61879100  | 3.46357100  | C          | 1.29844600  | 4.64934500  | -1.56954800 |
| H          | -0.45976000 | 2.23594300  | 3.43929100  | H          | 0.51406000  | 5.36602400  | -1.31136400 |
| C          | 0.07277400  | -1.55925100 | 2.26456000  | H          | 2.18884000  | 4.88445100  | -0.97867400 |
| H          | -0.91564000 | -1.16753000 | 2.01597700  | H          | 1.55392700  | 4.81324500  | -2.62182200 |
| H          | 0.26581600  | -2.36984200 | 1.55389800  | H          | -2.26597300 | 3.66253900  | 1.92357000  |
| C          | 0.06543300  | -2.11916800 | 3.69549000  | C          | 1.71859000  | -0.86510400 | -1.78524800 |
| H          | -0.73029700 | -2.86967000 | 3.77390700  | C          | 2.77420100  | -1.68662600 | -1.34449700 |
| H          | 1.00641500  | -2.61076200 | 3.96366700  | C          | 4.11086300  | -1.22901100 | -1.42817600 |
| H          | -0.13836400 | -1.34578700 | 4.44461900  | C          | 2.49971100  | -2.97934800 | -0.83981200 |
| I          | 1.55404500  | 2.48980800  | -0.68066100 | C          | 5.14766500  | -2.05406300 | -1.01293800 |
| C          | -2.68777100 | -0.03280500 | -0.30864600 | H          | 4.31409300  | -0.23978600 | -1.82569900 |
| C          | -1.45962900 | -0.02283400 | -0.29235200 | C          | 3.54763000  | -3.79089200 | -0.42393600 |
| C          | -4.11419500 | -0.03267100 | -0.32964600 | H          | 1.47213400  | -3.32010900 | -0.77516800 |
| C          | -4.84012600 | 1.17849700  | -0.32024900 | C          | 4.86645500  | -3.33051300 | -0.51058700 |

|               |             |             |             |                |             |             |             |
|---------------|-------------|-------------|-------------|----------------|-------------|-------------|-------------|
| H             | 6.17464700  | -1.70913100 | -1.07904500 | C              | 3.72259200  | 4.25572700  | 1.33349000  |
| H             | 3.34154200  | -4.78178100 | -0.03212700 | H              | 2.50253600  | 2.58983700  | 1.97462900  |
| H             | 5.68135000  | -3.97094000 | -0.18597600 | C              | 4.29066300  | 4.91226700  | 0.23353600  |
| C             | 0.77484700  | -0.11742900 | -2.06998600 | H              | 4.53435500  | 4.94431900  | -1.91060300 |
| H             | 0.13164200  | 0.25388200  | -2.84720800 | H              | 3.88196900  | 4.64073200  | 2.33649400  |
| C             | -5.40546200 | -2.70836100 | -0.24531400 | H              | 4.89013600  | 5.80491600  | 0.39031900  |
| C             | -5.91595700 | -1.73964700 | -1.11591100 | N              | 0.25070300  | -1.99854900 | 1.84302300  |
| C             | -5.12830900 | -0.64858500 | -1.46356500 | C              | -0.84127400 | -1.59111000 | 2.78761400  |
| C             | -3.82168300 | -0.52295000 | -0.94423600 | H              | -1.78416000 | -1.68922600 | 2.24803000  |
| C             | -3.31581200 | -1.50559500 | -0.06652700 | H              | -0.85425300 | -2.30721100 | 3.62606300  |
| C             | -4.11024600 | -2.59039800 | 0.27849400  | C              | 0.10296900  | -3.45317700 | 1.51745200  |
| H             | -6.02046400 | -3.56039700 | 0.03005500  | H              | 0.88340800  | -3.69913000 | 0.79588000  |
| H             | -6.92037000 | -1.83807900 | -1.51500600 | H              | 0.29420500  | -4.03448200 | 2.43487600  |
| H             | -5.51496000 | 0.11222400  | -2.13733800 | C              | 1.57551900  | -1.76370600 | 2.50124100  |
| H             | -2.31773300 | -1.40699700 | 0.34644800  | H              | 1.54977900  | -2.23605400 | 3.49770100  |
| H             | -3.72861400 | -3.34611000 | 0.95800400  | H              | 1.66744900  | -0.68717500 | 2.65070600  |
| C             | -3.05851700 | 0.63661800  | -1.35044000 | C              | -0.74750700 | -0.16506400 | 3.32858900  |
| H             | -3.58741400 | 1.33499000  | -2.02113300 | H              | 0.09390400  | -0.02191300 | 4.01294700  |
| O             | -1.89211800 | 0.93795200  | -1.04154700 | H              | -0.67965400 | 0.56463200  | 2.51720600  |
| <b>4-Et3N</b> |             |             |             | H              | -1.66537100 | 0.04877700  | 3.88713700  |
| C             | -2.82255400 | 0.61773100  | -0.15613100 | C              | -1.24629300 | -3.85306800 | 0.92140100  |
| C             | -1.73737400 | 0.05236800  | -0.07443000 | H              | -2.07068700 | -3.77652500 | 1.63586700  |
| Zn            | -0.02603100 | -0.84927000 | -0.00216000 | H              | -1.49243000 | -3.25284400 | 0.03930100  |
| I             | 1.19013900  | -1.97799800 | -2.02650900 | H              | -1.18364900 | -4.89774500 | 0.59820100  |
| O             | 1.42306300  | 0.75593600  | 0.48904000  | C              | 2.80257500  | -2.25477300 | 1.73502300  |
| C             | 1.94945600  | 1.42468400  | -0.40542000 | H              | 2.82782100  | -1.86344800 | 0.71456700  |
| H             | 1.82695800  | 1.11386400  | -1.45591000 | H              | 3.69764300  | -1.90120900 | 2.25959000  |
| C             | -4.09015100 | 1.26984100  | -0.26143200 | H              | 2.86375400  | -3.34548000 | 1.68388700  |
| C             | -5.03693000 | 0.84950400  | -1.21805800 | <b>13-Et3N</b> |             |             |             |
| C             | -4.42380500 | 2.34560000  | 0.58639600  | Zn             | 1.03211200  | 0.49112700  | -0.95520500 |
| C             | -6.27280100 | 1.48416100  | -1.31866700 | I              | 2.12087700  | 2.11139700  | -2.61364900 |
| H             | -4.78618100 | 0.02347300  | -1.87659900 | I              | 0.05218200  | -1.92770300 | -1.84169200 |
| C             | -5.66125100 | 2.97648300  | 0.47953700  | Zn             | -1.47638700 | -0.81218100 | 0.21761600  |
| H             | -3.69950500 | 2.67689500  | 1.32473800  | I              | -1.80515800 | -2.29427100 | 2.29560900  |
| C             | -6.59127200 | 2.54924500  | -0.47185800 | C              | -0.43881200 | 0.98936800  | 0.40033300  |
| H             | -6.99053100 | 1.14702300  | -2.06223500 | C              | -0.58571200 | 1.97066200  | 1.13866200  |
| H             | -5.90124800 | 3.80508500  | 1.14115100  | C              | -0.75090500 | 3.08733800  | 2.00592100  |
| H             | -7.55602700 | 3.04292000  | -0.55336100 | C              | -0.47788600 | 2.95891700  | 3.38423200  |
| C             | 2.75144800  | 2.62327700  | -0.16345300 | C              | -1.18737500 | 4.32938100  | 1.49936600  |
| C             | 3.32175800  | 3.28654200  | -1.26239800 | C              | -0.64578900 | 4.04973200  | 4.23218100  |
| C             | 2.95505800  | 3.11400800  | 1.13895900  | H              | -0.14290700 | 2.00105400  | 3.76966400  |
| C             | 4.09180400  | 4.43008000  | -1.06282700 | C              | -1.34244100 | 5.41606800  | 2.35496000  |
| H             | 3.15815600  | 2.90061800  | -2.26566400 | H              | -1.39037900 | 4.42676800  | 0.43744300  |

|   |             |             |             |
|---|-------------|-------------|-------------|
| C | -1.07535700 | 5.27786200  | 3.72037800  |
| H | -0.43897200 | 3.94421700  | 5.29328900  |
| H | -1.67238500 | 6.37198000  | 1.95837400  |
| H | -1.20086300 | 6.12788600  | 4.38541600  |
| C | 5.40973600  | -2.20625700 | 2.78445400  |
| C | 6.76179000  | -2.03608800 | 2.45778500  |
| C | 7.13727000  | -1.27030300 | 1.35011200  |
| C | 6.15717200  | -0.67110900 | 0.56346600  |
| C | 4.79960700  | -0.83666700 | 0.88819900  |
| C | 4.42697300  | -1.60915400 | 2.00493500  |
| H | 5.13022700  | -2.80628900 | 3.64527500  |
| H | 7.52622000  | -2.50583400 | 3.07080200  |
| H | 8.18721500  | -1.14496000 | 1.10343500  |
| H | 6.43388700  | -0.07452300 | -0.30253900 |
| H | 3.37315100  | -1.72909000 | 2.23552400  |
| C | 3.79300500  | -0.20126800 | 0.04790200  |
| H | 4.14749300  | 0.36982000  | -0.82571600 |
| O | 2.57801200  | -0.27412000 | 0.27100800  |
| N | -3.40687000 | -0.32913500 | -0.70889800 |
| C | -4.15586000 | 0.29390000  | 0.42874400  |
| H | -4.40858800 | -0.52085600 | 1.11332200  |
| H | -3.44279800 | 0.93300300  | 0.96200500  |
| C | -3.09478300 | 0.61479200  | -1.83014200 |
| H | -2.83297100 | 1.56908600  | -1.36288200 |
| H | -2.18426500 | 0.24308100  | -2.31035000 |
| C | -3.93980300 | -1.65936000 | -1.14980100 |
| H | -3.37821600 | -1.92672300 | -2.05023200 |
| C | -4.14197200 | 0.83145500  | -2.92975700 |
| H | -3.74553800 | 1.57507500  | -3.63105900 |
| H | -4.32333200 | -0.08366000 | -3.50143700 |
| H | -5.09899600 | 1.20133700  | -2.55480800 |
| C | -5.40061100 | 1.13905100  | 0.12789700  |
| H | -5.82506700 | 1.46583900  | 1.08465300  |
| H | -5.15582800 | 2.04143700  | -0.44103400 |
| H | -6.17655600 | 0.59090000  | -0.41068300 |
| H | -3.65638200 | -2.38295800 | -0.37774800 |
| C | -5.44572100 | -1.81127000 | -1.39938900 |
| H | -5.62704800 | -2.83422200 | -1.74971200 |
| H | -6.02453800 | -1.67987700 | -0.47989100 |
| H | -5.83426300 | -1.12568200 | -2.15603500 |
